# Supplementary material for: Systematic literature review and meta-analysis of the relationship between adherence, competence and outcome in psychotherapy for children and adolescents
Source: Springer Nature journal article supplement (doi:10.1007/s00787-018-1265-2), 2019-01-02
Supplement: MOESM2 [file 16370056]

# **Systematic Literature Review and Meta-Analysis of the Relationship between Adherence, Competence and Outcome in Psychotherapy for Children and Adolescents**

European Child and Adolescent Psychiatry

Hannah Collyer<sup>a</sup>

Ivan Eisler<sup>a</sup>

Matt Woolgar<sup>a</sup>

<sup>a</sup>Institute of Psychiatry, Psychology and Neuroscience, King's College London, London, UK

Correspondence concerning this article should be addressed to [hannah.collyer@kcl.ac.uk](mailto:hannah.collyer@kcl.ac.uk)

Appendix 2 : Study Characteristics

| Study                                        | Client Group                                              | Intervention                                  | Location    | N   | Clinical Group Age Range (Mean, SD) | RCT | Length of Follow-up                     | Adherence / Competence                                    |                                                               | Outcome Measure(s) used in Meta-Analysis |
|----------------------------------------------|-----------------------------------------------------------|-----------------------------------------------|-------------|-----|-------------------------------------|-----|-----------------------------------------|-----------------------------------------------------------|---------------------------------------------------------------|------------------------------------------|
|                                              |                                                           |                                               |             |     |                                     |     |                                         | Informant (inter-rater reliability)                       | Measure                                                       |                                          |
| Al, Stams, Asscher, and van der Laan (2014)  | Families in crisis with concerns about child safety       | Family crisis intervention program (FCIP)     | Netherlands | 183 | 0-18 (11.54, 5.17)                  | N   | Post intervention                       | Therapist                                                 | Implementation of six components of FCIP                      | Parent & Youth SDQ                       |
| Bloomquist et al. (2013)                     | Adjustment / aggressive / disruptive / socially withdrawn | Early risers "skills for success" program     | US          | 262 | Grade 1 & 2 (6.92, 0.93)            | N   | 1 & 2y post baseline (2y intervention ) | Adherence - therapist competence - supervisor (ICC = .62) | Extent & quality of delivery of behavioural change strategies | Teacher Rated BASC-2                     |
| Boyer et al. (2018)                          | Attention-Deficit/Hyperactivity Disorder (ADHD)           | CBT (Solution-Focused Treatment)              | Netherlands | 36  | 12-17 (14.28, 1.19)                 | Y   | Post intervention                       | Observer (ICC = .74)                                      | MITI 3.1.1 (competence scales only)                           | Plan/Organize scale of the Dutch BRIEF   |
| Dagenais, Briere, Gratton, and Dupont (2009) | Behavioural problems in families in crisis                | Family brief and intensive intervention (BII) | Canada      | 160 | 06-17 (14.7, 2.1)                   | N   | 6m follow-up                            | Therapist                                                 | Eight core BII principles (yes / no)                          | Placement / services required            |

| Study                                                                                           | Client Group                                         | Intervention                                      | Location | N   | Clinical<br>Group Age<br>Range<br>(Mean, <i>SD</i> ) | RCT                | Length of<br>Follow-up                    | Adherence / Competence                                                   |                                                                                                  | Outcome<br>Measure(s) used<br>in Meta-<br>Analysis                  |
|-------------------------------------------------------------------------------------------------|------------------------------------------------------|---------------------------------------------------|----------|-----|------------------------------------------------------|--------------------|-------------------------------------------|--------------------------------------------------------------------------|--------------------------------------------------------------------------------------------------|---------------------------------------------------------------------|
|                                                                                                 |                                                      |                                                   |          |     |                                                      |                    |                                           | Informant<br>(inter-rater<br>reliability)                                | Measure                                                                                          |                                                                     |
| Eames et al.<br>(2009)<br>Eames et al.<br>(2010)                                                | Prevention &<br>intervention for<br>conduct Disorder | Incredible<br>years parent<br>group               | UK       | 86  | 36 - 59 mths<br>(46.1mths,<br>6) <sup>a</sup>        | Y                  | 3m follow-<br>up                          | Observer<br>(inter-rater<br>agreement of<br>≥ 70% during<br>training)    | LOT                                                                                              | Parent Rated<br>ECBI Intensity<br>and Problem<br>Scales             |
| Eisen et al.<br>(2013)                                                                          | Risk of depressive<br>disorder                       | Youth single<br>session brief<br>MI               | US       | 43  | 14-21<br>(17.44,<br>2.17)                            | Y                  | 3m follow-<br>up                          | Observer<br>(consensus of<br>two raters)                                 | MITI-3<br>(composite<br>fidelity)                                                                | Youth CES-D-<br>10                                                  |
| Garner et al.<br>(2009)                                                                         | Substance abuse                                      | Youth A-CRA<br>(& parent &<br>family<br>sessions) | US       | 399 | 12-18 (N/A)                                          | Y                  | Post<br>intervention<br>& 3m<br>follow-up | Therapist                                                                | AES                                                                                              | Alcohol and<br>other drug use                                       |
| Garner et al.<br>(2012)<br>Campos-<br>Melady, Smith,<br>Meyers,<br>Godley, and<br>Godley (2017) | Substance abuse                                      | Youth A-CRA<br>(& parent &<br>family<br>sessions) | US       | 953 | N/A (15.8,<br>1.4)                                   | Block <sup>b</sup> | 6 m follow-<br>up                         | Observer (%<br>Agreement:<br>Competence =<br>95%<br>Adherence =<br>100%) | Therapist-<br>level A-CRA<br>competence<br>and patient-<br>level target A-<br>CRA<br>(adherence) | Substance Use<br>Remission<br>Status on the<br>GAIN                 |
| Gillespie,<br>Huey, and<br>Cunningham<br>(2017)                                                 | Substance using<br>youth offenders                   | MST                                               | US       | 40  | 12-17                                                | Y                  | 4m & 12m<br>post<br>baseline              | Observer<br>(ICC = .64)                                                  | MST<br>Principle<br>Adherence<br>(MPA)<br>Composite                                              | Arrest Record;<br>Self-Report<br>Alcohol &<br>Cannabis Use;<br>SRDS |

| Study                                                         | Client Group                 | Intervention                       | Location | N   | Clinical Group Age Range (Mean, <i>SD</i> ) | RCT | Length of Follow-up                                    | Adherence / Competence                                       |                                              | Outcome Measure(s) used in Meta-Analysis  |
|---------------------------------------------------------------|------------------------------|------------------------------------|----------|-----|---------------------------------------------|-----|--------------------------------------------------------|--------------------------------------------------------------|----------------------------------------------|-------------------------------------------|
|                                                               |                              |                                    |          |     |                                             |     |                                                        | Informant (inter-rater reliability)                          | Measure                                      |                                           |
| Gillham, Hamilton, Freres, Patton, and Gallop (2006)          | Elevated depression symptoms | Youth group CBT                    | US       | 147 | 11-12 (N/A)                                 | Y   | 2-4 wks post intervention & 6, 12, 18, & 24m follow-up | Observer (91% Agreement)                                     | Integrity rating created by PRP's developers | Youth-Report CDI                          |
| Ginsburg et al. (2012)<br>Becker, Becker, and Ginsburg (2012) | Anxiety disorder             | Individual CBT (& parent sessions) | US       | 17  | 07-17 (11.12, 2.75)                         | Y   | Post intervention & 1m follow-up                       | Observer (Trained to a reliability criterion of Kappa = .80) | TATC                                         | Clinician ADIS-C/P; Parent & Youth SCARED |
| Graham, Carr, Rooney, Sexton, and Wilson Satterfield (2014)   | Behavioural problems         | FFT                                | Ireland  | 98  | N/A (14.05, 1.93)                           | N   | Post intervention                                      | Supervisor                                                   | FFT TAM                                      | Parent & Youth SDQ                        |
| Hartnett, Carr, and Sexton (2016)                             | Behavioural problems         | FFT                                | Ireland  | 42  | N/A (14.22, 1.45)                           | Y   | Post intervention & 3m follow-up                       | Supervisor                                                   | FFT TAM                                      | Parent SDQ                                |

| Study                                            | Client Group                                          | Intervention       | Location                 | N  | Clinical<br>Group Age<br>Range<br>(Mean, <i>SD</i> ) | RCT | Length of<br>Follow-up                                         | Adherence / Competence                    |                                                            | Outcome<br>Measure(s) used<br>in Meta-<br>Analysis                                                                               |
|--------------------------------------------------|-------------------------------------------------------|--------------------|--------------------------|----|------------------------------------------------------|-----|----------------------------------------------------------------|-------------------------------------------|------------------------------------------------------------|----------------------------------------------------------------------------------------------------------------------------------|
|                                                  |                                                       |                    |                          |    |                                                      |     |                                                                | Informant<br>(inter-rater<br>reliability) | Measure                                                    |                                                                                                                                  |
| Helmond et al.<br>(2012)                         | Incarcerated<br>youth with<br>antisocial<br>behaviour | Youth group<br>CBT | Netherlands<br>& Belgium | 89 | N/A (15.54,<br>1.56)                                 | N   | Post<br>intervention                                           | Observer<br>(Kappa = .95)                 | Observation<br>Checklist<br>Program<br>Integrity<br>EQUIP. | Youth Rated<br>IAP-SFO<br>(Social Skills);<br>SRM-SFO<br>(Moral Value &<br>Moral<br>Judgement);<br>HIT (Cognitive<br>Distortion) |
| Henggeler et al.<br>(1997) <sup>c</sup>          | Violent and<br>chronic youth<br>offenders             | MST                | US                       | 82 | 10-17<br>(15.22,<br>N/A) <sup>a</sup>                | Y   | Post<br>intervention<br>(Offending<br>stats 1.7y<br>follow-up) | Client &<br>therapist<br>composite        | MST TAM                                                    | Arrests &<br>incarceration;<br>SRDS; Parent<br>RPBC                                                                              |
| Henggeler,<br>Pickrel, and<br>Brondino<br>(1999) | Substance using<br>youth offenders                    | MST                | US                       | 58 | 12-17 (15.7,<br>1.0) <sup>a</sup>                    | Y   | Post<br>intervention<br>& 6m<br>follow-up                      | Client &<br>therapist<br>composite        | MST TAM                                                    | Self-report<br>alcohol /<br>marijuana                                                                                            |
| Heywood and<br>Fergusson<br>(2016)               | Behavioural<br>Problems                               | FFT                | New<br>Zealand           | 59 | 9-16<br>(13y7m)                                      | N   | 6m & 12m<br>post<br>baseline                                   | Supervisor                                | Global<br>Therapist<br>Rating Scale<br>(GTRS)              | Combined<br>measure of<br>parent rated<br>conduct<br>problems,                                                                   |

| Study                                                                | Client Group                               | Intervention               | Location | N                     | Clinical<br>Group Age<br>Range<br>(Mean, <i>SD</i> ) | RCT   | Length of<br>Follow-up                              | Adherence / Competence                                                                                                   |                | Outcome<br>Measure(s) used<br>in Meta-<br>Analysis                           |
|----------------------------------------------------------------------|--------------------------------------------|----------------------------|----------|-----------------------|------------------------------------------------------|-------|-----------------------------------------------------|--------------------------------------------------------------------------------------------------------------------------|----------------|------------------------------------------------------------------------------|
|                                                                      |                                            |                            |          |                       |                                                      |       |                                                     | Informant<br>(inter-rater<br>reliability)                                                                                | Measure        |                                                                              |
|                                                                      |                                            |                            |          |                       |                                                      |       |                                                     |                                                                                                                          |                | parent & youth<br>rated alcohol &<br>substance use<br>frequency, and<br>SRDS |
| Hogue et al.<br>(2008) <sup>d</sup>                                  | Substance use and<br>behaviour<br>problems | Family MDFT<br>& youth CBT | US       | 74<br>MDFT,<br>62 CBT | 13-17 (15.5,<br>1.3)                                 | Y     | Post<br>intervention<br>& 6m &<br>12m follow-<br>up | Observer<br>ICC<br>Adherence<br>CBT = .56-.83<br>MDFT = .64-<br>.79<br>Competence<br>CBT = .01-.63<br>MDFT = .15-<br>.48 | TBRS – C       | TLFB cannabis<br>Frequency                                                   |
| Holth,<br>Torsheim,<br>Sheidow,<br>Ogden, and<br>Henggeler<br>(2011) | Substance use<br>disorder                  | MST                        | Norway   | 41                    | 13-17<br>(15y10m,<br>14m)                            | Block | During &<br>post<br>intervention                    | Client &<br>therapist<br>composite                                                                                       | CM/CBT-<br>TAM | Self-report<br>cannabis<br>abstinence                                        |

| Study                                      | Client Group                                                                        | Intervention                                        | Location    | N     | Clinical<br>Group Age<br>Range<br>(Mean, <i>SD</i> ) | RCT | Length of<br>Follow-up                    | Adherence / Competence                    |                                                                      | Outcome<br>Measure(s) used<br>in Meta-<br>Analysis                                                                                                    |
|--------------------------------------------|-------------------------------------------------------------------------------------|-----------------------------------------------------|-------------|-------|------------------------------------------------------|-----|-------------------------------------------|-------------------------------------------|----------------------------------------------------------------------|-------------------------------------------------------------------------------------------------------------------------------------------------------|
|                                            |                                                                                     |                                                     |             |       |                                                      |     |                                           | Informant<br>(inter-rater<br>reliability) | Measure                                                              |                                                                                                                                                       |
| Hukkelberg and<br>Ogden (2013)             | Externalising<br>behaviour                                                          | Parent<br>management<br>training<br>(individual)    | Norway      | 331   | 04-12 (8.7,<br>N/A)                                  | N   | Post<br>intervention                      | Observer<br>(Kappa = .67)                 | FIMP                                                                 | Parent CBCL &<br>PDR; Teacher<br>TRF                                                                                                                  |
| Forgatch and<br>DeGarmo<br>(2011)          |                                                                                     |                                                     |             |       |                                                      |     |                                           |                                           |                                                                      |                                                                                                                                                       |
| Lange et al.<br>(2017)                     | Antisocial or<br>delinquent<br>problem<br>behaviour                                 | MST                                                 | Netherlands | 4,290 | 12-17<br>(15.62,<br>1.38)                            | N   | End of<br>therapy                         | Caregiver                                 | TAM                                                                  | Living at home,<br>Engaged in<br>school or work,<br>No new arrests<br>Clinician ADIS-<br>C/P; Youth<br>MASC; Parent<br>CBCL<br>Internalising<br>Scale |
| Lange et al.<br>(2018)                     |                                                                                     |                                                     |             |       |                                                      |     |                                           |                                           |                                                                      |                                                                                                                                                       |
| Liber et al.<br>(2010)                     | Anxiety disorder                                                                    | Individual &<br>group CBT (&<br>parent<br>sessions) | Netherlands | 52    | 08-12<br>(10.22,<br>1.15)                            | Y   | 1m follow-<br>up                          | Observer<br>(Yule's Y =<br>.68)           | Dutch<br>translated<br>FRIENDS<br>treatment<br>adherence<br>protocol |                                                                                                                                                       |
| Lofholm et al.<br>(2014)                   | Severe behaviour<br>problems or<br>conduct disorder<br>(inc. juvenile<br>offenders) | MST                                                 | Sweden      | 973   | 12-17 (N/A)                                          | N   | Post<br>intervention                      | Caregiver                                 | MST TAM &<br>TAM-R                                                   | Criminal<br>behaviour at<br>completion of<br>treatment                                                                                                |
| Sundell et al.<br>(2008)                   |                                                                                     |                                                     |             |       |                                                      |     |                                           |                                           |                                                                      |                                                                                                                                                       |
| Maaskant, van<br>Roosj,<br>Overbeek, Oort, | Foster children<br>with severe<br>externalising<br>behaviour                        | Parent<br>Management<br>Training                    | Netherlands | 46    | 4-12 (7.85,<br>2.36)                                 | Y   | Post<br>intervention<br>& 4m<br>follow-up | Supervisor                                | FIMP                                                                 | Parent rated<br>CBCL &<br>teacher rated                                                                                                               |

| Study                                                                         | Client Group                             | Intervention                                                 | Location    | N   | Clinical<br>Group Age<br>Range<br>(Mean, <i>SD</i> ) | RCT | Length of<br>Follow-up                    | Adherence / Competence                                                     |                                                   | Outcome<br>Measure(s) used<br>in Meta-<br>Analysis                                |
|-------------------------------------------------------------------------------|------------------------------------------|--------------------------------------------------------------|-------------|-----|------------------------------------------------------|-----|-------------------------------------------|----------------------------------------------------------------------------|---------------------------------------------------|-----------------------------------------------------------------------------------|
|                                                                               |                                          |                                                              |             |     |                                                      |     |                                           | Informant<br>(inter-rater<br>reliability)                                  | Measure                                           |                                                                                   |
| and Hermanns<br>(2016)                                                        |                                          | Oregon<br>(PMTO)                                             |             |     |                                                      |     |                                           |                                                                            |                                                   | TRF (Dutch<br>versions)                                                           |
| McCambridge<br>et al. (2011)                                                  | Cannabis use                             | Youth single<br>session MI                                   | UK          | 75  | 16-19 (18,<br>N/A)                                   | Y   | 3m follow-<br>up                          | Observer<br>Adherence<br>ICC = .56-.98<br>Competence<br>ICC = .74 -<br>.91 | MITI-2<br>(separate<br>competence &<br>adherence) | Cannabis<br>cessation                                                             |
| Overbeek, de<br>Schipper,<br>Lamers-<br>Winkelman,<br>and Schuengel<br>(2013) | Exposure to<br>interparental<br>violence | Youth &<br>parent trauma-<br>focused<br>psycho-<br>education | Netherlands | 100 | 06-12 (9.35,<br>1.55)                                | Y   | Post<br>intervention<br>& 6m<br>Follow-Up | Observer<br>(insufficient<br>inter-rater<br>data)                          | Rated on<br>deviations<br>from the<br>manual      | Parent Report<br>TSCYC; Youth<br>Report TSCC                                      |
| Podell et al.<br>(2013)                                                       | Anxiety disorder                         | Youth<br>individual<br>CBT (&<br>parent<br>sessions)         | US          | 279 | 07-17<br>(10.76,<br>2.79)                            | Y   | Post<br>intervention                      | Observer<br>(insufficient<br>inter-rater<br>data)                          | CBTC                                              | Clinician<br>PARS; Youth<br>MASC; Parent<br>CBCL<br>Anxiety/Depres-<br>sion Scale |
| Robbins et al.<br>(2011)                                                      | Drug abuse                               | BSFT                                                         | US          | 246 | 12-17 (15.5,<br>1.3)                                 | Y   | Up to 12m<br>post<br>baseline             | Observer<br>(ICC = .83)                                                    | BSFT TAF                                          | TLFB<br>Substance Use                                                             |



| Study                                                                    | Client Group                                      | Intervention                                               | Location       | N                              | Clinical<br>Group Age<br>Range<br>(Mean, <i>SD</i> )               | RCT | Length of<br>Follow-up                                           | Adherence / Competence                    |                                         | Outcome<br>Measure(s) used<br>in Meta-<br>Analysis |
|--------------------------------------------------------------------------|---------------------------------------------------|------------------------------------------------------------|----------------|--------------------------------|--------------------------------------------------------------------|-----|------------------------------------------------------------------|-------------------------------------------|-----------------------------------------|----------------------------------------------------|
|                                                                          |                                                   |                                                            |                |                                |                                                                    |     |                                                                  | Informant<br>(inter-rater<br>reliability) | Measure                                 |                                                    |
| Rowe et al.<br>(2013)                                                    | Cannabis use<br>disorder                          | MDFT                                                       | Europe &<br>US | Europe<br>(212)<br>US<br>(171) | 13-18<br>(Europe:<br>16.3, 1.2) <sup>a</sup><br>(US: 15.6,<br>1.1) | Y   | 12m follow-<br>up                                                | Observer<br>(ICC = .81)                   | MDFT<br>Intervention<br>Inventory       | TLFB<br>Substance Use<br>Frequency &<br>Problem    |
| Schoenwald,<br>Sheidow, et al.<br>(2003) <sup>e</sup>                    | Serious antisocial<br>behaviour                   | MST                                                        | US             | 1979                           | N/A (14.0,<br>2.35)                                                | N   | Post<br>intervention<br>6m, 1y, 4y<br>follow-up                  | Caregiver                                 | MST TAM &<br>TAM-R                      | Parent CBCL<br>Externalising                       |
| Sexton and<br>Turner (2010)                                              | Youth offenders                                   | FFT                                                        | US             | 431                            | 13-17 (N/A)                                                        | Y   | 6-9m<br>follow-up                                                | Supervisor                                | FFT TAM                                 | Recidivism                                         |
| Shechtman and<br>Leichtentritt<br>(2010)                                 | Social, emotional,<br>and behavioural<br>problems | Youth<br>supportive-<br>expressive<br>group<br>counselling | Israel         | 266                            | 10-18 (N/A)                                                        | N   | Post<br>intervention                                             | Youth                                     | Adapted<br>CHSM                         | Self-report<br>aggression                          |
| Smith, Dishion,<br>Shaw, and<br>Wilson (2013)<br>Chiapa et al.<br>(2015) | Elevated problem<br>behaviour                     | Family check-<br>up                                        | US             | 79                             | 2y0m-<br>2y11m<br>(29.9 mths,<br>3.2)                              | Y   | Fidelity at<br>age 3,4 & 5<br>& follow-up<br>at age 7.5 &<br>8.5 | Observer<br>(ICC = .74)                   | COACH<br>observational<br>rating system | Parent CBCL<br>Externalising                       |

| Study                        | Client Group                     | Intervention           | Location | N  | Clinical<br>Group Age<br>Range<br>(Mean, <i>SD</i> ) | RCT | Length of<br>Follow-up  | Adherence / Competence                    |                                                            | Outcome<br>Measure(s) used<br>in Meta-<br>Analysis  |
|------------------------------|----------------------------------|------------------------|----------|----|------------------------------------------------------|-----|-------------------------|-------------------------------------------|------------------------------------------------------------|-----------------------------------------------------|
|                              |                                  |                        |          |    |                                                      |     |                         | Informant<br>(inter-rater<br>reliability) | Measure                                                    |                                                     |
| Strauss et al.<br>(2012)     | Autism spectrum<br>disorder      | Youth &<br>parent EIBI | Italy    | 24 | 26-81<br>months                                      | N   | 6m, 1y post<br>baseline | Observer<br>(ICC = .89 -<br>.96)          | Adherence<br>checklist;<br>OPTION<br>competence<br>measure | Observer rated<br>child<br>challenging<br>behaviour |
| Strauss et al.<br>(2015)     |                                  |                        |          |    | (55.67<br>months,<br>17.63)                          |     |                         |                                           |                                                            |                                                     |
| Williams and<br>Green (2012) | Serious emotional<br>disturbance | Youth &<br>parent CPSR | US       | 79 | N/A (10.31,<br>3.54)                                 | N   | 3wk follow-<br>up       | Parent                                    | CTAM                                                       | Parent Rated<br>YCIS                                |

<sup>a</sup> Age is reported for whole sample including control

<sup>b</sup> Block randomisation (by site)

<sup>c</sup> Study also reported in Schoenwald, Henggeler, Brondino, and Rowland (2000), Huey, Henggeler, Brondino, and Pickrel (2000)

<sup>d</sup> Study also reported in Hogue, Liddle, Dauber, and Samuolis (2004), Hogue et al. (2006)

<sup>e</sup> Study also reported in Schoenwald, Carter, Chapman, and Sheidow (2008), Schoenwald, Chapman, Sheidow, and Carter (2009), Schoenwald, Sheidow, and Chapman (2009), Halliday-Boykins et al. (2005), Chapman and Schoenwald (2011)

Interventions: A-CRA = Adolescent Community Reinforcement Approach; BSFT = Brief Strategic Family Therapy; CBT = Cognitive Behavioural Therapy; CPSR = Child psychiatric rehabilitation; EIBI = Early Intensive Behavioural Intervention; FFT = Functional Family Therapy; MDFT = Multidimensional Family Therapy; MI = Motivational Interviewing; MST = Multisystemic Therapy;

Adherence / Competence Measures: AES = A-CRA Exposure Scale; CBTC = CBT Checklist; CHSM = Counsellor Helping Skills Measure; CTAM = Children's Psychosocial Rehabilitation Treatment Adherence Measure; FIMP = Fidelity of Implementation Rating Scale; LOT = Leader Observation Tool; MITI-2/3 = Motivational Interview Treatment Integrity 2/3; OPTION = Observing Patient Involvement Scale; TAF = Therapist Adherence Form; TAM(-R) = Therapist Adherence Measure (Revised); TATC = Treatment Adherence and Therapist Competence; TBRS-C = Therapist Behavior Rating Scale—Competence;

Outcome Measures: ADIS-C/P = Rated Anxiety Disorders Interview Schedule for DSM-IV, Parent and Child Versions; BASC-2 = Behavioural Assessment System for Children-II; BRIEF = Behaviour Rating Inventory of Executive Function; CBCL = Child Behaviour Checklist; CDI – Clinical Depression Inventory; CES-D-10 = 10-item Center for Epidemiologic Studies Depression Scale; ECBI = Eyberg Child Behaviour Inventory; GAIN = Global Appraisal of Individual Needs; HIT = How I Think Questionnaire; IAP-SFO = Inventory of Adolescent Problems — Short Form Objective; MASC = Multidimensional Anxiety Scale for Children; PARS = Pediatric Anxiety Rating Scale; PDR = Parent Daily Report; RPBC = Revised Problem Behaviour Checklist; SCARED = Screen for Child Anxiety—Related Emotional Disorders; SDQ = Strength & Difficulties Questionnaire; SRDS = Self Report Delinquency Scale; SRM-SFO = Sociomoral Reflection Measure — Short Form Objective; TLFB = Time Line Follow-Back; TRF = Teacher Report Form; TSCC = Trauma Symptom Checklist for Children; TSCYC = Trauma Symptom Checklist for Young Children; YCIS = Youth Counseling Impact Scale;
