# Supplementary material for: Systematic literature review and meta-analysis of the relationship between adherence, competence and outcome in psychotherapy for children and adolescents
Source: Springer Nature journal article supplement (doi:10.1007/s00787-018-1265-2), 2019-01-02
Supplement: MOESM4 [file 16370056]

# **Systematic Literature Review and Meta-Analysis of the Relationship between Adherence, Competence and Outcome in Psychotherapy for Children and Adolescents**

European Child and Adolescent Psychiatry

Hannah Collyer<sup>a</sup>

Ivan Eisler<sup>a</sup>

Matt Woolgar<sup>a</sup>

<sup>a</sup>Institute of Psychiatry, Psychology and Neuroscience, King's College London, London, UK

Correspondence concerning this article should be addressed to [hannah.collyer@kcl.ac.uk](mailto:hannah.collyer@kcl.ac.uk)

Appendix 4 : Study Quality

| Study                        | Power       | Risk of Bias in Included Participants |                           |                    | Risk of Bias in Reliability and Validity of Measures |                                | Risk of Bias in Control for Confounding Variables |                                              | Number of Items with Lower Quality |
|------------------------------|-------------|---------------------------------------|---------------------------|--------------------|------------------------------------------------------|--------------------------------|---------------------------------------------------|----------------------------------------------|------------------------------------|
|                              | Sample Size | Participation Rate                    | Attrition or Missing Data | Selection Criteria | Reliability of Implementation Measure                | Reliability of Outcome Measure | Adjusted or Controlled for Baseline Severity      | Adjusted or Controlled for Other Confounders |                                    |
| Al et al. (2014)             | +           | -                                     | -                         | -                  | -                                                    | +                              | +                                                 | -                                            | 5                                  |
| Bloomquist et al. (2013)     | +           | +                                     | +                         | +                  | -                                                    | +                              | +                                                 | -                                            | 2                                  |
| Boyer et al. (2008)          | -           | -                                     | +                         | -                  | +                                                    | +                              | +                                                 | +                                            | 3                                  |
| Dagenais et al. (2009)       | +           | +                                     | +                         | -                  | -                                                    | -                              | -                                                 | -                                            | 5                                  |
| Eames et al. (2009)          | +           | +                                     | +                         | +                  | -                                                    | +                              | +                                                 | -                                            | 2                                  |
| Eisen et al. (2013)          | -           | -                                     | -                         | +                  | +                                                    | +                              | +                                                 | +                                            | 3                                  |
| Garner et al. (2009)         | +           | +                                     | +                         | +                  | -                                                    | +                              | +                                                 | +                                            | 1                                  |
| Garner et al. (2012)         | +           | -                                     | -                         | -                  | +                                                    | +                              | -                                                 | -                                            | 5                                  |
| Gillespie et al. (2017)      | -           | +                                     | +                         | +                  | +                                                    | +                              | +                                                 | +                                            | 1                                  |
| Gillham et al. (2006)        | +           | +                                     | -                         | +                  | +                                                    | +                              | +                                                 | +                                            | 1                                  |
| Ginsburg et al. (2012)       | -           | +                                     | +                         | +                  | +                                                    | +                              | +                                                 | -                                            | 2                                  |
| Graham et al. (2014)         | +           | -                                     | +                         | -                  | -                                                    | +                              | +                                                 | +                                            | 3                                  |
| Hartnett et al. (2016)       | -           | -                                     | -                         | +                  | -                                                    | +                              | -                                                 | -                                            | 6                                  |
| Helmond et al. (2012)        | +           | -                                     | -                         | -                  | +                                                    | -                              | +                                                 | +                                            | 4                                  |
| Henggeler et al. (1997)      | +           | +                                     | +                         | +                  | -                                                    | +                              | +                                                 | -                                            | 2                                  |
| Henggeler et al. (1999)      | -           | +                                     | +                         | +                  | -                                                    | +                              | +                                                 | -                                            | 3                                  |
| Heywood and Fergusson (2016) | -           | +                                     | -                         | -                  | -                                                    | +                              | +                                                 | -                                            | 5                                  |
| Hogue et al. (2008)          | +           | +                                     | -                         | +                  | -                                                    | +                              | +                                                 | +                                            | 2                                  |
| Holth et al. (2011)          | -           | +                                     | -                         | +                  | -                                                    | +                              | +                                                 | +                                            | 3                                  |
| Hukkelberg and Ogden (2013)  | +           | -                                     | -                         | -                  | +                                                    | +                              | +                                                 | -                                            | 4                                  |
| Lange et al. (2017)          | +           | +                                     | +                         | -                  | -                                                    | +                              | -                                                 | +                                            | 3                                  |

| Study                              | Power       | Risk of Bias in Included Participants |                           |                    | Risk of Bias in Reliability and Validity of Measures |                                | Risk of Bias in Control for Confounding Variables |                                              | Number of Items with Lower Quality |
|------------------------------------|-------------|---------------------------------------|---------------------------|--------------------|------------------------------------------------------|--------------------------------|---------------------------------------------------|----------------------------------------------|------------------------------------|
|                                    | Sample Size | Participation Rate                    | Attrition or Missing Data | Selection Criteria | Reliability of Implementation Measure                | Reliability of Outcome Measure | Adjusted or Controlled for Baseline Severity      | Adjusted or Controlled for Other Confounders |                                    |
| Liber et al. (2010)                | -           | +                                     | +                         | +                  | +                                                    | +                              | +                                                 | +                                            | 1                                  |
| Lofholm et al. (2014)              | +           | +                                     | -                         | -                  | -                                                    | -                              | -                                                 | +                                            | 5                                  |
| Maaskant et al. (2016)             | -           | -                                     | -                         | +                  | -                                                    | +                              | +                                                 | -                                            | 5                                  |
| McCambridge et al. (2011)          | +           | -                                     | +                         | -                  | -                                                    | +                              | -                                                 | +                                            | 4                                  |
| Overbeek et al. (2013)             | +           | +                                     | +                         | -                  | -                                                    | +                              | +                                                 | +                                            | 2                                  |
| Podell et al. (2013)               | +           | +                                     | +                         | +                  | -                                                    | +                              | +                                                 | +                                            | 1                                  |
| Robbins et al. (2011)              | +           | -                                     | -                         | +                  | +                                                    | +                              | +                                                 | -                                            | 3                                  |
| Rowe et al. (2013)                 | +           | -                                     | +                         | +                  | -                                                    | +                              | +                                                 | -                                            | 3                                  |
| Schoenwald, Sheidow, et al. (2003) | +           | +                                     | +                         | -                  | -                                                    | +                              | +                                                 | +                                            | 2                                  |
| Sexton and Turner (2010)           | +           | -                                     | +                         | -                  | -                                                    | +                              | +                                                 | +                                            | 3                                  |
| Shechtman and Leichtenritt (2010)  | +           | +                                     | +                         | -                  | -                                                    | +                              | +                                                 | +                                            | 2                                  |
| Smith et al. (2013)                | +           | +                                     | -                         | +                  | +                                                    | +                              | +                                                 | -                                            | 2                                  |
| Strauss et al. (2012)              | -           | -                                     | +                         | +                  | +                                                    | -                              | +                                                 | +                                            | 3                                  |
| Williams and Green (2012)          | -           | -                                     | +                         | -                  | -                                                    | +                              | +                                                 | +                                            | 4                                  |
| N of studies at risk (of 35)       | 12 (34%)    | 15 (43%)                              | 14 (40%)                  | 16 (46%)           | 23 (66%)                                             | 4 (11%)                        | 6 (17%)                                           | 15 (43%)                                     |                                    |

‘+’ = lower risk of bias or higher quality ; ‘-’ = higher risk of bias or lower quality (see methods section for criteria)
